# Supplementary material for: Advances in the Rapid Diagnostic of Viral Respiratory Tract Infections
Source: PubMed Central journal article supplement (PMC8895598; doi:10.3389/fcimb.2022.807253), 2022-02-10
Supplement: Table_1.pdf [file Table_1.pdf]

**TABLE 1: Main diagnostic methods in virology**

| Methods to diagnose viral infections    | Method                                                               | Principle and Application                                                                                                                                                         | Advantages                                                                                                                                                                                                                                         | Limitations                                                                                                                                                                                                                                                                                                                                                                                                                                      | Protocols                                                                                                                                                                                                                                                                 |
|-----------------------------------------|----------------------------------------------------------------------|-----------------------------------------------------------------------------------------------------------------------------------------------------------------------------------|----------------------------------------------------------------------------------------------------------------------------------------------------------------------------------------------------------------------------------------------------|--------------------------------------------------------------------------------------------------------------------------------------------------------------------------------------------------------------------------------------------------------------------------------------------------------------------------------------------------------------------------------------------------------------------------------------------------|---------------------------------------------------------------------------------------------------------------------------------------------------------------------------------------------------------------------------------------------------------------------------|
| <i>Conventional</i>                     |                                                                      |                                                                                                                                                                                   |                                                                                                                                                                                                                                                    |                                                                                                                                                                                                                                                                                                                                                                                                                                                  |                                                                                                                                                                                                                                                                           |
| Infectivity assays (cell culture-based) | Virus plaque test: (Leland and Ginocchio 2007, Mendoza et al., 2020) | Quantitative detection (virus multiplication, and isolation) of viruses forming plaques on the monolayer of cells in cell culture plates                                          | <ul style="list-style-type: none"> <li>- It is the gold standard for the virus isolation.</li> <li>- With TEM is used during large scale outbreaks with new viruses (Johnson et al., 1977, Drosten et al., 2003, Harcourt et al., 2020)</li> </ul> | <ul style="list-style-type: none"> <li>- It is limited to only a subset of animal viruses that can lead to cell lysis.</li> <li>- Has false negatives from difficult-to-culture viruses (coronaviruses, MPV, many serotypes of human rhinovirus HRV) or unknown viruses when cell lines are chosen incorrectly. (Henrickson 2004, Van Den Hoogen, Osterhaus et al. 2004)</li> <li>- It is time-consuming, laboratory-based, expensive</li> </ul> | <ul style="list-style-type: none"> <li>- For virus confirmation: Cell culture + TEM (Goldsmith and Miller 2009); Cell culture + Hemagglutination assay.</li> <li>-For virus identification: Cell culture + immunofluorescence staining (Amarilla et al., 2021)</li> </ul> |
|                                         | Shell vial (rapid cell culture)                                      | A platform including the specimen inoculation on the cell monolayer grown on a coverslip, low-speed centrifugation, and detection of the virus by immunofluorescence              | rapid technique to isolate Influenza, and other respiratory viruses(Lu et al., 2021).                                                                                                                                                              | Has insufficient sensitivity                                                                                                                                                                                                                                                                                                                                                                                                                     | For virus detection: Rapid cell culture + immunofluorescence                                                                                                                                                                                                              |
|                                         | Viral flow cytometry                                                 | Direct or indirect virus quantification using specific cell constituent dyes, antibodies to identify virus proteins and subtypes (Schulze-Horsel et al., 2008, Soni et al., 2020) | Has relatively short turnaround time. It is easy to interpret the results. It can be automated.                                                                                                                                                    | <ul style="list-style-type: none"> <li>-It has insufficient sensitivity and specificity.</li> <li>-It requires sophisticated equipment and specific training to use it.</li> <li>-The primary antibody needs to be specific</li> </ul>                                                                                                                                                                                                           | <ul style="list-style-type: none"> <li>- Coupled with fluorescence microscopy, and confocal microscopes, as imaging flow cytometers, it is typically a more practical and faster method of visualizing viral infections. (McClelland et al., 2021)</li> </ul>             |

**TABLE 1: Main diagnostic methods in virology**

|                                                                                                                                                                                                                                             |                                           |                                                                                                                                                                                                           |                                                                                                                                                                                                                                                 |                                                                                                                                        |                                                                                                                                                    |
|---------------------------------------------------------------------------------------------------------------------------------------------------------------------------------------------------------------------------------------------|-------------------------------------------|-----------------------------------------------------------------------------------------------------------------------------------------------------------------------------------------------------------|-------------------------------------------------------------------------------------------------------------------------------------------------------------------------------------------------------------------------------------------------|----------------------------------------------------------------------------------------------------------------------------------------|----------------------------------------------------------------------------------------------------------------------------------------------------|
|                                                                                                                                                                                                                                             | Transmission electron microscopy (TEM)    | A beam of electrons transmitted through a specimen for intracellular imaging                                                                                                                              | -Directly images the viral particles.<br>-Elucidates structures and conformations of complex and dynamic proteins without crystallization in their native, fully functional states                                                              | The sample preparation for TEM is laborious                                                                                            | It follows cell culture for virus identification (McClelland et al., 2021)                                                                         |
| Serological methods (immunoassays)<br>Rapid detection of known viruses with known viral proteins: serotyping (detection of viral antigens in serum) and serodiagnosis (detection and quantification of specific antibodies in bodily fluid) | Radioimmunoassay (RIA) (Kim et al., 2021) | Radioisotopes-labelled immune reaction to viral specific immunoglobulins or antigen levels                                                                                                                | -Detects either antigens or antibodies with high sensitivity.<br>-Differentiates between exposed asymptomatic, acutely, or mildly sick, and recovered cases                                                                                     | Has long incubation time and radiation risk                                                                                            |                                                                                                                                                    |
|                                                                                                                                                                                                                                             | Enzyme-linked immune assays (EIA)         | The enzyme-linked immunosorbent assay (ELISA) (Khanna et al., 2001)                                                                                                                                       | Has high sensitivity, and it is a routine assay for protein detection, especially at significantly low levels (i.e., influenza virus infections)                                                                                                | Gives false-negative results during the window between the viral infection and the start of antibody production                        |                                                                                                                                                    |
|                                                                                                                                                                                                                                             |                                           | Chemiluminescence immunoassay (CLIA) (Zhu et al., 2020)                                                                                                                                                   | -Same with ELISA<br>-It can be an automated                                                                                                                                                                                                     | -Same with ELISA<br>-Requires complex equipment                                                                                        |                                                                                                                                                    |
|                                                                                                                                                                                                                                             | Hemagglutination assay                    | adherence of red blood cells to the surface of the viruses infected cells (hemadsorption) plus visible agglutination of erythrocytes in specific patterns (Connor and Loeb 1983, Uhlendorff et al., 2009) | -It gives direct visualisation<br>-Can compare the relative concentrations of a virus between samples, such as those obtained from multiple infected hosts, or those collected sequentially from an individual host on different days or times. | -Similar to cell cultures<br>-Cannot accurately determine the number of virus particles present in a sample (i.e., virus particles/mL) | For virus isolation: inoculation of cell culture and subsequent demonstration of CPE, hemagglutinins, IFA, or hemadsorption (Dolskiy et al., 2020) |
|                                                                                                                                                                                                                                             | Hemagglutination inhibition assay         | Specific antibodies against viral antigens                                                                                                                                                                | -Gives direct visualisation.<br>-It is a fast and inexpensive method for vaccine, epidemiologic and antigenic cartography (Spackman and Sitaras 2020)                                                                                           | It is replaced by gene sequencing technology                                                                                           |                                                                                                                                                    |

**TABLE 1: Main diagnostic methods in virology**

|                                                           |                                                                    |                                                                                                                         |                                                                                                                                                                                                                                                                                                           |                                                                                                                                                                                                                                                                                                                                                                                                                         |                                                                                                                                       |                                                                         |
|-----------------------------------------------------------|--------------------------------------------------------------------|-------------------------------------------------------------------------------------------------------------------------|-----------------------------------------------------------------------------------------------------------------------------------------------------------------------------------------------------------------------------------------------------------------------------------------------------------|-------------------------------------------------------------------------------------------------------------------------------------------------------------------------------------------------------------------------------------------------------------------------------------------------------------------------------------------------------------------------------------------------------------------------|---------------------------------------------------------------------------------------------------------------------------------------|-------------------------------------------------------------------------|
|                                                           | Complement fixation test                                           | reaction of the complement with an antigen-antibody complex                                                             | -Gives direct visualisation.                                                                                                                                                                                                                                                                              | Its application is limited by the available suitable cross-reactive antigens to cover the existing virus serotypes                                                                                                                                                                                                                                                                                                      | It is part of various protocols for respiratory viruses (Zhang et al. 2020)                                                           |                                                                         |
| <i>New methods</i>                                        |                                                                    |                                                                                                                         |                                                                                                                                                                                                                                                                                                           |                                                                                                                                                                                                                                                                                                                                                                                                                         |                                                                                                                                       |                                                                         |
| Nucleic acid amplification technique (NAAT)-based methods | Polymerase chain reaction (PCR) - the reference test               | Viral proteins and nucleic acids detection for rapid known virus detection with known invariable portions of the genome | -It is fast, cheap, highly sensitive and specific detection and can be used for multiplex tests.<br>-rt RT-PCR assay provides faster quantitative analysis, with an equal or better sensitivity than cell culture methods (Van Elden et al., 2001)<br>-Has reduced contamination risk(Zhang et al., 2020) | -Requires specialised equipment and technical expertise about nucleotide sequence.<br>-Has long turnaround-time (multiple steps for sample preparation, difficult data processing).<br>-Gives false-positive results in persistent inactive infections with SARS-CoV-2, Epstein-Barr virus or adenovirus (Babiker et al., 2021) and difficult detection of unknown viruses and of viruses with highly variable genomes. |                                                                                                                                       |                                                                         |
|                                                           | Loop-mediated amplification (LAMP) (Thi et al., 2020)              |                                                                                                                         |                                                                                                                                                                                                                                                                                                           |                                                                                                                                                                                                                                                                                                                                                                                                                         | simple, rapid and cheap diagnostic tests performed without specialized equipment, in one single step, high sensitivity, possible POCT | may require additional sequence- specific detection using NGS or CRISPR |
|                                                           | CRISPR like                                                        |                                                                                                                         |                                                                                                                                                                                                                                                                                                           |                                                                                                                                                                                                                                                                                                                                                                                                                         |                                                                                                                                       | LAMP + CRISPR                                                           |
| Next Generation Sequencing                                | sequencing methods for DNA and RNA sequencing (Bloom et al., 2020) | for new viruses, to identify mutations in the viral genome                                                              | can identify the viral nucleotide sequence, at high throughput data from multiple samples, and for possible large-scale testing                                                                                                                                                                           | Developing technique                                                                                                                                                                                                                                                                                                                                                                                                    | LAMP + NGS                                                                                                                            |                                                                         |

**TABLE 1: Main diagnostic methods in virology**

|                     |                            |                       |                                                                                                                                                                                                         |                                                                                                                                                                                                                                                                                                                                                                                                                                                                   |                                                                                                                                                                                               |
|---------------------|----------------------------|-----------------------|---------------------------------------------------------------------------------------------------------------------------------------------------------------------------------------------------------|-------------------------------------------------------------------------------------------------------------------------------------------------------------------------------------------------------------------------------------------------------------------------------------------------------------------------------------------------------------------------------------------------------------------------------------------------------------------|-----------------------------------------------------------------------------------------------------------------------------------------------------------------------------------------------|
| Rapid antigen tests | lateral flow immunoassays, | for active infections | Rapid (10-30 minutes) test that can facilitate frequent decentralised testing at scale, with very few false positive results, and with high sensitivity for most infectious cases (Crozier et al. 2021) | -Gives false negative due to technical errors and during the 5-7 day incubation period and 1-2 days before symptom onset.(Lauer et al. 2020)<br>-The tests 'performance falls when used by untrained staff or public (less when repeated)<br>- Infectious window is early and narrow (hard to find cases before they transmit infection).<br>- Does not quantify the level of virus material detected to reflect a level of infectiousness (Crozier et al., 2021) | In a low prevalence setting viruses can be detected by confirmatory PCR testing ( <a href="https://apps.who.int/iris/handle/10665/334253">https://apps.who.int/iris/handle/10665/334253</a> ) |
|---------------------|----------------------------|-----------------------|---------------------------------------------------------------------------------------------------------------------------------------------------------------------------------------------------------|-------------------------------------------------------------------------------------------------------------------------------------------------------------------------------------------------------------------------------------------------------------------------------------------------------------------------------------------------------------------------------------------------------------------------------------------------------------------|-----------------------------------------------------------------------------------------------------------------------------------------------------------------------------------------------|

Amarilla, A. A., N. Modhiran, Y. X. Setoh, N. Y. Peng, J. D. Sng, B. Liang, C. L. McMillan, M. E. Freney, S. T. Cheung and K. J. Chappell (2021). "An optimized high-throughput immuno-plaque assay for SARS-CoV-2." *Frontiers in microbiology* **12**.

Babiker, A., K. Immergluck, S. D. Stampfer, A. Rao, L. Bassit, M. Su, V. Nguyen, V. Stittleburg, J. M. Ingersoll and H. L. Bradley (2021). "Single-amplicon, multiplex real-time RT-PCR with tiled probes to detect SARS-CoV-2 spike mutations associated with variants of concern." *Journal of clinical microbiology: JCM*. 01446-01421.

Bloom, J. S., L. Sathe, C. Munugala, E. M. Jones, M. Gasperini, N. B. Lubock, F. Yarza, E. M. Thompson, K. M. Kovary and J. Park (2020). "Swab-Seq: A high-throughput platform for massively scaled up SARS-CoV-2 testing." *MedRxiv*.

Connor, E. M. and M. R. Loeb (1983). "A Hemadsorption Method for Detection of Colonies of Haemophilus influenzae Type b Expressing Fimbriae." *Journal of Infectious Diseases* **148**(5): 855-860.

Crozier, A., S. Rajan, I. Buchan and M. McKee (2021). "Put to the test: use of rapid testing technologies for covid-19." *bmj* **372**.

Dolskiy, A. A., I. V. Grishchenko and D. V. Yudkin (2020). "Cell Cultures for Virology: Usability, Advantages, and Prospects." *International Journal of Molecular Sciences* **21**(21): 7978.

Drosten, C., S. Günther, W. Preiser, S. Van Der Werf, H.-R. Brodt, S. Becker, H. Rabenau, M. Panning, L. Kolesnikova and R. A. Fouchier (2003). "Identification of a novel coronavirus in patients with severe acute respiratory syndrome." *New England journal of medicine* **348**(20): 1967-1976.

**TABLE 1: Main diagnostic methods in virology**

- Goldsmith, C. S. and S. E. Miller (2009). "Modern uses of electron microscopy for detection of viruses." *Clinical microbiology reviews* **22**(4): 552-563.
- Harcourt, J., A. Tamin, X. Lu, S. Kamili, S. K. Sakhivel, J. Murray, K. Queen, Y. Tao, C. R. Paden and J. Zhang (2020). "Severe acute respiratory syndrome coronavirus 2 from patient with coronavirus disease, United States." *Emerging infectious diseases* **26**(6): 1266.
- Henrickson, K. J. (2004). "Advances in the laboratory diagnosis of viral respiratory disease." *The Pediatric infectious disease journal* **23**(1): S6-S10.
- <https://apps.who.int/iris/handle/10665/334253>. Retrieved 08/12, 2021.
- Johnson, K., P. Webb, J. Lange and F. Murphy (1977). "Isolation and partial characterisation of a new virus causing acute haemorrhagic fever in Zaire." *Lancet*: 569-571.
- Khanna, M., P. Kumar, L. Chugh, A. Prasad and S. Chhabra (2001). "Evaluation of influenza virus detection by direct enzyme immunoassay (EIA) and conventional methods in asthmatic patients." *The Journal of communicable diseases* **33**(3): 163-169.
- Kim, J.-H., S.-Y. Lee and S.-K. Lee (2021). "Development of novel lab-on-a-chip platform for high-throughput radioimmunoassay." *Applied Radiation and Isotopes* **168**: 109526.
- Lauer, S. A., K. H. Grantz, Q. Bi, F. K. Jones, Q. Zheng, H. R. Meredith, A. S. Azman, N. G. Reich and J. Lessler (2020). "The incubation period of coronavirus disease 2019 (COVID-19) from publicly reported confirmed cases: estimation and application." *Annals of internal medicine* **172**(9): 577-582.
- Leland, D. S. and C. C. Ginocchio (2007). "Role of cell culture for virus detection in the age of technology." *Clinical microbiology reviews* **20**(1): 49-78.
- Lu, S., S. Lin, H. Zhang, L. Liang and S. Shen (2021). "Methods of Respiratory Virus Detection: Advances towards Point-of-Care for Early Intervention." *Micromachines* **12**(6): 697.
- McClelland, R. D., T. N. Culp and D. J. Marchant (2021). "Imaging Flow Cytometry and Confocal Immunofluorescence Microscopy of Virus-Host Cell Interactions." *Frontiers in Cellular and Infection Microbiology* **11**.
- Mendoza, E. J., K. Mangiat, H. Wood and M. Drebot (2020). "Two detailed plaque assay protocols for the quantification of infectious SARS-CoV-2." *Current protocols in microbiology* **57**(1): cpmc105.
- Schulze-Horsel, J., Y. Genzel and U. Reichl (2008). "Flow cytometric monitoring of influenza A virus infection in MDCK cells during vaccine production." *BMC biotechnology* **8**(1): 1-12.
- Soni, N., P. Pai, G. R. Krishna Kumar, V. Prasad, S. Dasgupta and B. Bhadra (2020). "A flow virometry process proposed for detection of SARS-CoV-2 and large-scale screening of COVID-19 cases." *Future Virology* **15**(8): 525-532.
- Spackman, E. and I. Sitaras (2020). Hemagglutination inhibition assay. *Animal Influenza Virus, Springer*: 11-28.
- Thi, V. L. D., K. Herbst, K. Boerner, M. Meurer, L. P. Kremer, D. Kirrmaier, A. Freistaedter, D. Papagiannidis, C. Galmozzi and M. L. Stanifer (2020). "A colorimetric RT-LAMP assay and LAMP-sequencing for detecting SARS-CoV-2 RNA in clinical samples." *Science translational medicine* **12**(556).

## TABLE 1: Main diagnostic methods in virology

- Uhlendorff, J., T. Matrosovich, H.-D. Klenk and M. Matrosovich (2009). "Functional significance of the hemadsorption activity of influenza virus neuraminidase and its alteration in pandemic viruses." *Archives of virology* **154**(6): 945-957.
- Van Den Hoogen, B. G., D. Osterhaus and R. A. Fouchier (2004). "Clinical impact and diagnosis of human metapneumovirus infection." *The Pediatric infectious disease journal* **23**(1): S25-S32.
- Van Elden, L., M. Nijhuis, P. Schipper, R. Schuurman and A. Van Loon (2001). "Simultaneous detection of influenza viruses A and B using real-time quantitative PCR." *Journal of clinical microbiology* **39**(1): 196-200.
- Zhang, M., J. Ye, J.-s. He, F. Zhang, J. Ping, C. Qian and J. Wu (2020). "Visual detection for nucleic acid-based techniques as potential on-site detection methods. A review." *Analytica chimica acta* **1099**: 1-15.
- Zhang, N., L. Wang, X. Deng, R. Liang, M. Su, C. He, L. Hu, Y. Su, J. Ren and F. Yu (2020). "Recent advances in the detection of respiratory virus infection in humans." *Journal of medical virology* **92**(4): 408-417.
- Zhu, H., Z. Fohlerová, J. Pekárek, E. Basova and P. Nežžil (2020). "Recent advances in lab-on-a-chip technologies for viral diagnosis." *Biosensors and Bioelectronics* **153**: 112041.
