# Supplementary material for: Advances in the Rapid Diagnostic of Viral Respiratory Tract Infections
Source: PubMed Central journal article supplement (PMC8895598; doi:10.3389/fcimb.2022.807253), 2022-02-10
Supplement: Table_2.pdf [file Table_2.pdf]

**TABLE 2: Specific diagnostic test devices in viral respiratory infections**

| Company                                                                                                | Kit                                                | Virus                                                                                                                                                                                                                                                                                                                                                                                                                                                     | Method                          | Sample Type                                         | Sensitivity                                                                                                                     | Specificity                                               | Time     | Highlights                                                                                                                    | References                                                                                                                                           |
|--------------------------------------------------------------------------------------------------------|----------------------------------------------------|-----------------------------------------------------------------------------------------------------------------------------------------------------------------------------------------------------------------------------------------------------------------------------------------------------------------------------------------------------------------------------------------------------------------------------------------------------------|---------------------------------|-----------------------------------------------------|---------------------------------------------------------------------------------------------------------------------------------|-----------------------------------------------------------|----------|-------------------------------------------------------------------------------------------------------------------------------|------------------------------------------------------------------------------------------------------------------------------------------------------|
| <b>Commercially available respiratory virus detection tests/sample-in-answer-out detection systems</b> |                                                    |                                                                                                                                                                                                                                                                                                                                                                                                                                                           |                                 |                                                     |                                                                                                                                 |                                                           |          |                                                                                                                               |                                                                                                                                                      |
| <b>Molecular Diagnostics</b>                                                                           |                                                    |                                                                                                                                                                                                                                                                                                                                                                                                                                                           |                                 |                                                     |                                                                                                                                 |                                                           |          |                                                                                                                               |                                                                                                                                                      |
| Cepheid (cepheid.com)                                                                                  | The GeneXpert Dx System                            | Influenza A/B, respiratory syncytial virus                                                                                                                                                                                                                                                                                                                                                                                                                | multiplex rt RT-PCR             | w/o pretreatment                                    | Flu A: 100%<br>Flu B: 100%                                                                                                      | Flu A: 100%<br>Flu B: 97.8%                               | 7-30 min | automated sample-in-answer-out detection                                                                                      | (Baron and Persing 2019)                                                                                                                             |
|                                                                                                        | GeneXpert® Xpress SARS-CoV-2                       | SARS-CoV-2                                                                                                                                                                                                                                                                                                                                                                                                                                                | Real-time RT-qPCR               | nasal swab, nasopharyngeal swab, aspirate specimens | 100%                                                                                                                            | 100%                                                      | 45 min   | meets the current urgent need for COVID-19 testing; sample-in-answer-out detection                                            | (Loeffelholz et al., 2020, Zhen et al., 2020)                                                                                                        |
|                                                                                                        | GeneXpert® Xpress Flu/RSV                          | flu virus (A,B,RSV)                                                                                                                                                                                                                                                                                                                                                                                                                                       | Real-time RT-PCR                | nasal swab, nasopharyngeal swab specimens           | Flu A: 98.1%<br>Flu B: 100%<br>RSV: 98.4%                                                                                       | Flu A: 98.1%<br>Flu B: 99.1%<br>RSV: 99.3%                | 20 min   | Detects viral RNA, enabling better detection of seasonal mutations of the flu virus (A,b,RSV); sample-in-answer-out detection | (Ling et al., 2018)                                                                                                                                  |
| Biofire(biofire dx.com)                                                                                | The BioFire FilmArray® Respiratory (RP&RP2) Panels | VIRUSES: Adenovirus; Coronavirus HKU1; Coronavirus NL63; Coronavirus 229E; Coronavirus OC43; Human Metapneumovirus; Human Rhinovirus/Enterovirus; Influenza A; Influenza A/H1; Influenza A/H3; Influenza A/H1-2009; Influenza B; Parainfluenza Virus 1/2/3/4; Respiratory Syncytial Virus<br>BACTERIA: Bordetella parapertussis; Bordetella pertussis; Chlamydia pneumoniae; Mycoplasma pneumoniae<br>* Available only on the BioFire Respiratory Panel 2 | Real-time RT-PCR molecular test | nasopharyngeal swab in transport media              | 97.1%                                                                                                                           | 99.3%                                                     | 45 min   | data indicated that the frozen storage did not significantly affect performance; sample-in-answer-out detection               | (Leber et al., 2018)                                                                                                                                 |
|                                                                                                        | BioFire® Respiratory Panel 2.1-EZ (RP2.1-EZ)       | VIRUSES: Adenovirus; Coronavirus; Human Metapneumovirus; Human Rhinovirus/ Enterovirus; Influenza A; Influenza A/H1; Influenza A/H3; Influenza A/H1-2009; Influenza B; Parainfluenza Virus; Respiratory<br>BACTERIA: Bordetella pertussis; Chlamydia pneumoniae; Mycoplasma pneumoniae                                                                                                                                                                    | Real-time RT-PCR molecular test | nasopharyngeal swab                                 | BAL: 96.2%<br>Sputum: 96.3%                                                                                                     | BAL: 98.3%<br>Sputum: 97.2%                               | 45 min   | For use with the BioFire® FilmArray® 2.0 EZ Configuration System; sample-in-answer-out detection                              | BioFire® Respiratory Panel 2.1-EZ (RP2.1-EZ) ; ( <a href="https://www.fda.gov/media/142696/download">https://www.fda.gov/media/142696/download</a> ) |
| Luminex                                                                                                | Aries Flu A/B & RSV assay                          | 18 respiratory viruses and subtypes                                                                                                                                                                                                                                                                                                                                                                                                                       | MultiCode PCR                   | nasopharyngeal swab                                 | 98.6% (fluA), 93.3% (fluB) and 95.1% (RSV); in pediatric studies: 98.1% for influenza A virus, 98.0% for influenza B virus, and | 100% for all targets; in pediatric studies: 98.6% - 99.8% | 2 h      | is a "sample to answer" automated                                                                                             | (Tang et al., 2016, Voermans et al., 2016)                                                                                                           |

**TABLE 2: Specific diagnostic test devices in viral respiratory infections**

|                                           |                                                                  |                                   |                                          |                                                                                     |                                                                                                                |                                                                                                                |                                                                          |                                                                                                                                                                                                                                                                                                  |                                                                                                                                                                                                                                                               |
|-------------------------------------------|------------------------------------------------------------------|-----------------------------------|------------------------------------------|-------------------------------------------------------------------------------------|----------------------------------------------------------------------------------------------------------------|----------------------------------------------------------------------------------------------------------------|--------------------------------------------------------------------------|--------------------------------------------------------------------------------------------------------------------------------------------------------------------------------------------------------------------------------------------------------------------------------------------------|---------------------------------------------------------------------------------------------------------------------------------------------------------------------------------------------------------------------------------------------------------------|
|                                           |                                                                  |                                   |                                          |                                                                                     | 97.7% for RSV;                                                                                                 |                                                                                                                |                                                                          |                                                                                                                                                                                                                                                                                                  |                                                                                                                                                                                                                                                               |
| Roche (diagnostics.roche.com)             | Cobas Flu A/B & RSV                                              | FluA, FluB, and RSV               | RT-PCR                                   | nasopharyngeal swabs                                                                | 96.0 - 100.0% for all three viruses                                                                            | 99.3 - 100% for all three viruses                                                                              | on-demand single-specimen: 21 min; batched 12-specimen workflow: 254 min | integrated nucleic acid extraction-independent devices for simultaneous detection and identification of the viral antigens; with no significant differences revealed among the Aries Flu A/B & RSV, the Xpert Xpress Flu/RSV, and the Cobas Flu A/B & RSV assays; sample-in-answer-out detection | (Ling et al., 2018, Jokela et al., 2020)                                                                                                                                                                                                                      |
| Mobidiag (mobidiag.com)                   | Novodiag® (Novodiag® COVID-19; Mobidiag Amplidiag® Covid-19 kit) | Novel coronavirus                 | RT-PCR                                   | nasopharyngeal swabs                                                                | 93.4%;                                                                                                         | 100%                                                                                                           | ~1 - 2,75h                                                               | fully automated Multiple RT-PCR and microarray detection of CarbaR+/Novel coronavirus/C. difficile; perform penicillin and myxomycetin resistance test; limited ability to detect low viral load samples                                                                                         | (Li et al., 2020)                                                                                                                                                                                                                                             |
| <b>Immunology-Based Rapid Tests (RAT)</b> |                                                                  |                                   |                                          |                                                                                     |                                                                                                                |                                                                                                                |                                                                          |                                                                                                                                                                                                                                                                                                  |                                                                                                                                                                                                                                                               |
| Abbott                                    | SD Bioline Influenza Antigen Test®                               | Influenza virus type A&B and H1N1 | antigen test                             | human nasal swab, throat swab, nasopharyngeal swab or nasal/nasopharyngeal aspirate | 91.8%                                                                                                          | 98.9%                                                                                                          | 5 min                                                                    | RAT for POCT to be complemented with PCR                                                                                                                                                                                                                                                         | SD BIOLINE Influenza Ag A/B/ A(H1N1) Pandemic. Product Page.( <a href="https://www.alere.com/en/home/product-details/sd-bioline-influenza-ag-aba-pandemic.html">https://www.alere.com/en/home/product-details/sd-bioline-influenza-ag-aba-pandemic.html</a> ) |
| Abbott                                    | SD Bioline Influenza Ultra                                       | Influenza virus type A&B          | antigen test                             | nasopharyngeal swab, nasopharyngeal aspirate                                        | nasopharyngeal swab<br>Flu A: 88.5%<br>Flu B: 91.5%<br>nasopharyngeal aspirate<br>Flu A: 93.9%<br>Flu B: 91.7% | nasopharyngeal swab<br>Flu A: 97.4%<br>Flu B: 97.4%<br>nasopharyngeal aspirate<br>Flu A: 97.7%<br>Flu B: 97.7% | 5-8 min                                                                  |                                                                                                                                                                                                                                                                                                  | (Nelson et al., 2020)                                                                                                                                                                                                                                         |
| Abbott                                    | CLEARVIE W® EXACT INFLUENZ A A&B                                 | Influenza virus type A&B          | chromatographic immunoassay antigen test | nasopharyngeal swab                                                                 | Flu A: 81.7%<br>Flu B: 88.6%                                                                                   | Flu A: 98.5%<br>Flu B: 97.4%                                                                                   | 15 min                                                                   | insufficient sensitivity, prone to false negatives, test results to be combined with clinical practice for accurate diagnoses                                                                                                                                                                    | (de la Tabla et al., 2010)                                                                                                                                                                                                                                    |
| Abbott                                    | Alere BINAXNO W® INFLUENZ A A&B                                  | Influenza virus type A&B          | chromatographic immunoassay antigen test | nasopharyngeal swab, nasopharyngeal aspirate                                        | Flu A: 70-89%<br>Flu B: 50-69%                                                                                 | Flu A: 90-99%<br>Flu B: 94-100%                                                                                | 15 min                                                                   | any age in the acute stage of the outbreak and in patients under 18 years of age                                                                                                                                                                                                                 | (Fuenzalida et al., 2010, Hazelton et al., 2015)                                                                                                                                                                                                              |

**TABLE 2: Specific diagnostic test devices in viral respiratory infections**

|                                                                             |                                            |                                                           |                                                             |                                               |                                                                                                   |                                                                          |            |                                                                                                          |                                                                                                                                                                                                                                                                                                                                                          |
|-----------------------------------------------------------------------------|--------------------------------------------|-----------------------------------------------------------|-------------------------------------------------------------|-----------------------------------------------|---------------------------------------------------------------------------------------------------|--------------------------------------------------------------------------|------------|----------------------------------------------------------------------------------------------------------|----------------------------------------------------------------------------------------------------------------------------------------------------------------------------------------------------------------------------------------------------------------------------------------------------------------------------------------------------------|
| BioMedomics                                                                 | COVID-19 IgM/IgG Rapid Test                | SARS-CoV-2                                                | serological antibody test                                   | human serum                                   | IgM: 86.7%<br>IgG: 96.7%<br>Combined: 100%                                                        | IgM: 95.0%<br>IgG: 96.2%<br>Combined: 92.5%                              | 10-15 min  | screen symptomatic or asymptomatic virus carriers; to verify the effectiveness of virus treatment.       | Serology Test Evaluation Report BioMedomics, ( <a href="https://www.accessdata.fda.gov/cdrh_docs/presentations/maf/maf3328-a001.pdf">https://www.accessdata.fda.gov/cdrh_docs/presentations/maf/maf3328-a001.pdf</a> .)                                                                                                                                  |
| Lucira Health (lucirahealth.com)                                            | Lucira™ Covid-19 All-in-One Test Kit       | SARS-CoV-2                                                | LAMP technology                                             | nasal swab                                    | 100% conformance rate compared to highly sensitive detection methods                              |                                                                          | 30 min     | the first home self-test kit FDA emergency authorized (November 2020) for sample-in-answer-out detection | FDA Authorizes First COVID-19 Test for Self-Testing at Home. ( <a href="https://www.fda.gov/news-events/press-announcements/coronavirus-covid-19-update-fda-authorizes-first-covid-19-test-self-testing-home">https://www.fda.gov/news-events/press-announcements/coronavirus-covid-19-update-fda-authorizes-first-covid-19-test-self-testing-home</a> ) |
| <b>Advances in Respiratory Virus Testing for Rapid Diagnosis (Research)</b> |                                            |                                                           |                                                             |                                               |                                                                                                   |                                                                          |            |                                                                                                          |                                                                                                                                                                                                                                                                                                                                                          |
| <b>Rapid Diagnostic Test</b>                                                |                                            |                                                           |                                                             |                                               |                                                                                                   |                                                                          |            |                                                                                                          |                                                                                                                                                                                                                                                                                                                                                          |
|                                                                             | RT-LAMP diagnostic platforms               | influenza viruses (H5N1, H5N6, H1N1, H3N2 and H7N9), MERS | colorimetric multiplex reverse transcription LAMP (RT-LAMP) |                                               | Influenza: 100%;<br>MERS higher than RT-LAMP Assay                                                | high; no cross-reactivity with any of SARS-CoV, HKU4, HKU1, OC43 or 229E | 1h         | for POC testing                                                                                          | (Huang et al., 2018, Ahn et al., 2019)                                                                                                                                                                                                                                                                                                                   |
| <b>Immunoassay Paper-Based Devices/Technology</b>                           |                                            |                                                           |                                                             |                                               |                                                                                                   |                                                                          |            |                                                                                                          |                                                                                                                                                                                                                                                                                                                                                          |
|                                                                             | Lateral flow test stripes                  | H1N1 and HAdV                                             | surface-enhanced Raman scattering (SERS) spectroscopy       | human serum                                   | detection limit for H1N1: 50pfu/mL; HAdV 10 pfu/mL (2000-fold lower than the standard gold strip) | not specified                                                            | Rapid test | potential to detect coronavirus, in complex specimens.                                                   | (Wang et al., 2019)                                                                                                                                                                                                                                                                                                                                      |
|                                                                             | Lateral flow test stripes                  | SARS-CoV-2                                                | surface-enhanced Raman scattering (SERS) spectroscopy       | venous blood samples and finger blood samples | IgM, IgG combined: 88.66%                                                                         | IgM, IgG combined: 90.63%                                                | Rapid test | test symptomatic and asymptomatic SARS-CoV-2 carriers at the POC                                         | (Li et al., 2020)                                                                                                                                                                                                                                                                                                                                        |
| <b>Biosensors for Respiratory Virus Detection</b>                           |                                            |                                                           |                                                             |                                               |                                                                                                   |                                                                          |            |                                                                                                          |                                                                                                                                                                                                                                                                                                                                                          |
|                                                                             | mini 3D-printed readout biosensor platform | avian influenza A (H7N9) virus                            | quantum dot (QD)-based immunochromatographic strips         |                                               | detection limit of 0.0268 HAU                                                                     | was 98% conformance rate compared to real-time PCR                       | 15 min     | assessment of the result by the naked eye                                                                | (Xiao et al., 2019)                                                                                                                                                                                                                                                                                                                                      |
|                                                                             | electrochemical biosensor                  | influenza virus A (H9N2)                                  | electrochemical biosensor                                   | pharyngeal swab                               | detection limit of 10 <sup>-8</sup> U/mL                                                          | NA                                                                       | 30 -60 min | improved properties of the biosensor for POCT                                                            | (Anik et al., 2018)                                                                                                                                                                                                                                                                                                                                      |

**TABLE 2: Specific diagnostic test devices in viral respiratory infections**

|                                                            |                                              |                                                                                                                                        |                                                                              |                     |                                                           |                                                      |        |                                                                                                                                                            |                          |
|------------------------------------------------------------|----------------------------------------------|----------------------------------------------------------------------------------------------------------------------------------------|------------------------------------------------------------------------------|---------------------|-----------------------------------------------------------|------------------------------------------------------|--------|------------------------------------------------------------------------------------------------------------------------------------------------------------|--------------------------|
|                                                            | electrochemical immunosensor                 | MERS-CoV                                                                                                                               | carbon electrode dielectrophoresis (DEP) array                               |                     | 0.001 ng/mL; improved to 1.0 pg/mL                        | NA                                                   | 20 min | potential for other respiratory viruses' detection; immunological biosensors cannot be used for accurate detection in the early stages of viral infection; | (Layqah and Eissa, 2019) |
|                                                            | impedimetric immunobiosensor                 | influenza A viruses                                                                                                                    | electrochemical probe                                                        | serum viral antigen | detection limit: 0.79 fM; linear range: 0.18 f. - 0.18 nM | NA                                                   | NA     |                                                                                                                                                            | (Dunajová et al., 2020)  |
|                                                            | arch-shaped multiple-target sensors platform | MERSCoV, HCoV, EBOV and ZIKV                                                                                                           | oligonucleotides amplification                                               | serum viral antigen | high                                                      | high                                                 | 20 min |                                                                                                                                                            | (Dunajová et al., 2020)  |
| <b>Microfluidic Device for Respiratory Virus Detection</b> |                                              |                                                                                                                                        |                                                                              |                     |                                                           |                                                      |        |                                                                                                                                                            |                          |
|                                                            | RNA assay chip                               | influenza A and B virus and human adenoviruses                                                                                         | PCR+ colorimetry                                                             |                     | 96% (CI: 78.1 - 99.9)                                     | 100% (CI:94.9 - 100.0)                               | <1h    |                                                                                                                                                            | (Wang et al., 2018)      |
|                                                            | RNA assay chip                               | SARS-CoV, MERS-CoV, SARS-CoV-2, HCoV (HCoV-OC43, HCoV-229E, HCoV-HKU1, HCoV-NL63)                                                      | LAMP                                                                         |                     | 100%                                                      |                                                      | 40 min | portable microfluidic system for simultaneous detection of coronaviruses                                                                                   | (Xiong et al., 2020)     |
|                                                            | RTisochip™-W                                 | H7N9, CA16, RSV, HPIV1, HPIV2, HPIV3, HPIV4, HCoV-229E/NL63, HMPV, H1N1, H3N2, influenza B, EV71, HCoV-OC43/HKU1, CA6, HRV, SARS-CoV-2 | multi-index nucleic acid isothermal amplification                            | pharyngeal swab     | detection limit : <50 copies/ uL (equivalent to RT-PCR)   | high; 98.5% coincidence rate with the RT-PCR results | 90 min | multi-index nucleic acid isothermal amplification analyzer with a centrifugal microfluidic chip                                                            | (Xing et al., 2020)      |
| <b>Smartphone-Based Detection Technologies</b>             |                                              |                                                                                                                                        |                                                                              |                     |                                                           |                                                      |        |                                                                                                                                                            |                          |
|                                                            | 3D nanostructures platform                   | avian influenza virus                                                                                                                  | ZnO nanorod-based colorimetric immunoassay                                   | serum viral antigen | LOD: 8x10e3 EID50/mL - 2.7 x10e4 EID50/mL                 | NA                                                   | 1.5 h  | Sensitivity higher than the conventional fluorescence-based ELISA assay                                                                                    | (Xia et al., 2019)       |
|                                                            | ddPCR platform                               | RNA load                                                                                                                               | droplet digital PCR fluorescence reading                                     | spiked saliva       | LODs : 3.8 copies/20 uL of sample                         | dynamic range of 4–100 copies                        | 1.5 h  | RNA extraction may not be necessary                                                                                                                        | (Chen et al., 2021)      |
|                                                            | SERS imaging biosensor                       | influenza A/H1N1 virus                                                                                                                 | Surface-enhanced Raman scattering (SERS)                                     |                     | LOD: 97 PFU mL <sup>-1</sup> ;                            | NA                                                   | 20 min | three orders of magnitude more sensitive than ELISA                                                                                                        | (Chen et al., 2020)      |
|                                                            | droplet-based digital LAMP                   | ctDNA                                                                                                                                  | digital IFAST (immiscible phase filtration assisted by surface tension)-LAMP | spiked plasma       | recovery rate 75%                                         | NA                                                   | 1h     | complicated manual operations                                                                                                                              | (Hu et al., 2019)        |

**TABLE 2: Specific diagnostic test devices in viral respiratory infections**

|  |                    |       |     |               |                                                                     |    |     |                                                                  |                     |
|--|--------------------|-------|-----|---------------|---------------------------------------------------------------------|----|-----|------------------------------------------------------------------|---------------------|
|  | IddPCR microdevice | ctDNA | PCR | spiked plasma | for EGFR Gene T790 M mutation: 1% mutant from 2 mL of plasma sample | NA | ~1h | a fully integrated digital droplet PCR microdevice liquid biopsy | (Geng et al., 2020) |
|--|--------------------|-------|-----|---------------|---------------------------------------------------------------------|----|-----|------------------------------------------------------------------|---------------------|

Ahn, S. J., Y. H. Baek, K. K. S. Lloren, W.-S. Choi, J. H. Jeong, K. J. C. Antigua, H.-i. Kwon, S.-J. Park, E.-H. Kim and Y.-i. Kim (2019). "Rapid and simple colorimetric detection of multiple influenza viruses infecting humans using a reverse transcriptional loop-mediated isothermal amplification (RT-LAMP) diagnostic platform." *BMC infectious diseases* **19**(1): 1-12.

Anik, Ü., Y. Tepeli, M. Sayhi, J. Nsiri and M. F. Diouani (2018). "Towards the electrochemical diagnostic of influenza virus: Development of a graphene–Au hybrid nanocomposite modified influenza virus biosensor based on neuraminidase activity." *Analyst* **143**(1): 150-156.

Baron, E. J. and D. H. Persing (2019). "Invited Product Profile–GeneXpert Xpress System for Respiratory Testing: State-of-the-Art Molecular Testing for Any Health Care Setting." *Point of Care* **18**(2): 66-71.

Chen, H., S.-G. Park, N. Choi, J.-I. Moon, H. Dang, A. Das, S. Lee, D.-G. Kim, L. Chen and J. Choo (2020). "SERS imaging-based aptasensor for ultrasensitive and reproducible detection of influenza virus A." *Biosensors and Bioelectronics* **167**: 112496.

Chen, L., V. Yadav, C. Zhang, X. Huo, C. Wang, S. Senapati and H.-C. Chang (2021). "Elliptical Pipette Generated Large Microdroplets for POC Visual ddPCR Quantification of Low Viral Load." *Analytical Chemistry* **93**(16): 6456-6462.

de la Tabla, V. O., P. Antequera, M. Masiá, P. Ros, C. Martin, G. Gazquez, F. Buñuel, V. Sánchez, C. Robledano and F. Gutiérrez (2010). "Clinical evaluation of rapid point-of-care testing for detection of novel influenza A (H1N1) virus in a population-based study in Spain." *Clinical microbiology and infection* **16**(9): 1358-1361.

Dunajová, A. A., M. Gál, K. Tomčíková, R. Sokolová, V. Kolivoška, E. Vaněčková, F. Kielar, F. Kostolanský, E. Varečková and M. Naumowicz (2020). "Ultrasensitive impedimetric immunosensor for influenza A detection." *Journal of Electroanalytical Chemistry* **858**: 113813.

Fuenzalida, L., S. Blanco, C. Prat, M. Vivancos, M. Dominguez, J. M. Mòdol, C. Rodrigo and V. Ausina (2010). "Utility of the rapid antigen detection BinaxNOW Influenza A&B test for detection of novel influenza A (H1N1) virus." *Clinical microbiology and infection* **16**(10): 1574-1576.

Geng, Z., S. Li, L. Zhu, Z. Cheng, M. Jin, B. Liu, Y. Guo and P. Liu (2020). "“Sample-to-Answer” Detection of Rare ctDNA Mutation from 2 mL Plasma with a Fully Integrated DNA Extraction and Digital Droplet PCR Microdevice for Liquid Biopsy." *Analytical chemistry* **92**(10): 7240-7248.

Hazelton, B., T. Gray, J. Ho, V. M. Ratnamohan, D. E. Dwyer and J. Kok (2015). "Detection of influenza A and B with the Alere™ i Influenza A & B: a novel isothermal nucleic acid amplification assay." *Influenza and other respiratory viruses* **9**(3): 151-154.

[https://www.accessdata.fda.gov/cdrh\\_docs/presentations/maf/maf3328-a001.pdf](https://www.accessdata.fda.gov/cdrh_docs/presentations/maf/maf3328-a001.pdf).

<https://www.alere.com/en/home/product-details/sd-bioline-influenza-ag-aba-pandemic.html>.

<https://www.fda.gov/media/142696/download>.

<https://www.fda.gov/news-events/press-announcements/coronavirus-covid-19-update-fda-authorizes-first-covid-19-test-self-testing-home>.

Hu, F., J. Li, Z. Zhang, M. Li, S. Zhao, Z. Li and N. Peng (2019). "Smartphone-based droplet digital LAMP device with rapid nucleic acid isolation for highly sensitive point-of-care detection." *Analytical chemistry* **92**(2): 2258-2265.

**TABLE 2: Specific diagnostic test devices in viral respiratory infections**

- Huang, P., H. Wang, Z. Cao, H. Jin, H. Chi, J. Zhao, B. Yu, F. Yan, X. Hu and F. Wu (2018). "A rapid and specific assay for the detection of MERS-CoV." *Frontiers in microbiology* **9**: 1101.
- Jokela, P., A. E. Jääskeläinen, H. Jarva, T. Holma, M. J. Ahava, L. Mannonen, M. Lappalainen, S. Kurkela and R. Loginov (2020). "SARS-CoV-2 sample-to-answer nucleic acid testing in a tertiary care emergency department: evaluation and utility." *Journal of Clinical Virology* **131**: 104614.
- Layqah, L. A. and S. Eissa (2019). "An electrochemical immunosensor for the corona virus associated with the Middle East respiratory syndrome using an array of gold nanoparticle-modified carbon electrodes." *Microchimica Acta* **186**(4): 1-10.
- Leber, A. L., K. Everhart, J. A. Daly, A. Hopper, A. Harrington, P. Schreckenberger, K. McKinley, M. Jones, K. Holmberg and B. Kensinger (2018). "Multicenter evaluation of BioFire FilmArray Respiratory Panel 2 for detection of viruses and bacteria in nasopharyngeal swab samples." *Journal of clinical microbiology* **56**(6): e01945-01917.
- Li, Z., Y. Bai, M. You, J. Hu, C. Yao, L. Cao and F. Xu (2020). "Fully integrated microfluidic devices for qualitative, quantitative and digital nucleic acids testing at point of care." *Biosensors and Bioelectronics*: 112952.
- Li, Z., Y. Yi, X. Luo, N. Xiong, Y. Liu, S. Li, R. Sun, Y. Wang, B. Hu and W. Chen (2020). "Development and clinical application of a rapid IgM-IgG combined antibody test for SARS-CoV-2 infection diagnosis." *Journal of medical virology* **92**(9): 1518-1524.
- Ling, L., S. E. Kaplan, J. C. Lopez, J. Stiles, X. Lu and Y.-W. Tang (2018). "Parallel validation of three molecular devices for simultaneous detection and identification of influenza A and B and respiratory syncytial viruses." *Journal of clinical microbiology* **56**(3): e01691-01617.
- Loeffelholz, M. J., D. Alland, S. M. Butler-Wu, U. Pandey, C. F. Perno, A. Nava, K. C. Carroll, H. Mostafa, E. Davies and A. McEwan (2020). "Multicenter evaluation of the cepheid Xpert Xpress SARS-CoV-2 test." *Journal of clinical microbiology* **58**(8): e00926-00920.
- Nelson, P. P., B. A. Rath, P. C. Fragkou, E. Antalis, S. Tsiodras and C. Skevaki (2020). "Current and future point-of-care tests for emerging and new respiratory viruses and future perspectives." *Frontiers in cellular and infection microbiology* **10**: 181.
- Tang, Y.-W., S. Gonsalves, J. Y. Sun, J. Stiles, K. A. Gilhuley, A. Mikhlina, S. A. Dunbar, N. E. Babady and H. Zhang (2016). "Clinical evaluation of the Luminex NxTAG respiratory pathogen panel." *Journal of clinical microbiology* **54**(7): 1912-1914.
- Voermans, J. J., S. Seven-Deniz, P. Fraaij, A. A. van der Eijk, M. Koopmans and S. D. Pas (2016). "Performance evaluation of a rapid molecular diagnostic, MultiCode based, sample-to-answer assay for the simultaneous detection of influenza A, B and respiratory syncytial viruses." *Journal of Clinical Virology* **85**: 65-70.
- Wang, C., C. Wang, X. Wang, K. Wang, Y. Zhu, Z. Rong, W. Wang, R. Xiao and S. Wang (2019). "Magnetic SERS strip for sensitive and simultaneous detection of respiratory viruses." *ACS applied materials & interfaces* **11**(21): 19495-19505.
- Wang, R., R. Zhao, Y. Li, W. Kong, X. Guo, Y. Yang, F. Wu, W. Liu, H. Song and R. Hao (2018). "Rapid detection of multiple respiratory viruses based on microfluidic isothermal amplification and a real-time colorimetric method." *Lab on a Chip* **18**(22): 3507-3515.
- Xia, Y., Y. Chen, Y. Tang, G. Cheng, X. Yu, H. He, G. Cao, H. Lu, Z. Liu and S.-Y. Zheng (2019). "Smartphone-based point-of-care microfluidic platform fabricated with a ZnO nanorod template for colorimetric virus detection." *ACS sensors* **4**(12): 3298-3307.
- Xiao, M., L. Huang, X. Dong, K. Xie, H. Shen, C. Huang, W. Xiao, M. Jin and Y. Tang (2019). "Integration of a 3D-printed read-out platform with a quantum dot-based immunoassay for detection of the avian influenza A (H7N9) virus." *Analyst* **144**(8): 2594-2603.
- Xing, W., Y. Liu, H. Wang, S. Li, Y. Lin, L. Chen, Y. Zhao, S. Chao, X. Huang and S. Ge (2020). "A high-throughput, multi-index isothermal amplification platform for rapid detection of 19 types of common respiratory viruses including SARS-CoV-2." *Engineering*.

**TABLE 2: Specific diagnostic test devices in viral respiratory infections**

Xiong, H., X. Ye, Y. Li, L. Wang, J. Zhang, X. Fang and J. Kong (2020). "Rapid differential diagnosis of seven human respiratory coronaviruses based on centrifugal microfluidic nucleic acid assay." *Analytical chemistry* **92**(21): 14297-14302.

Zhen, W., E. Smith, R. Manji, D. Schron and G. J. Berry (2020). "Clinical evaluation of three sample-to-answer platforms for detection of SARS-CoV-2." *Journal of clinical microbiology* **58**(8): e00783-00720.
