# Supplementary material for: Advances in the Rapid Diagnostic of Viral Respiratory Tract Infections
Source: PubMed Central journal article supplement (PMC8895598; doi:10.3389/fcimb.2022.807253), 2022-02-10
Supplement: Table_3.pdf [file Table_3.pdf]

**Table 3: IoT approaches in COVID-19 management**

| <b>IoT type</b>                | <b>Example</b>                                                               | <b>Description</b>                                                                                                                                | <b>References</b>                                                                                                |
|--------------------------------|------------------------------------------------------------------------------|---------------------------------------------------------------------------------------------------------------------------------------------------|------------------------------------------------------------------------------------------------------------------|
| <b>Smartphone applications</b> | DetectaChem (USA)                                                            | Low cost COVID-19 testing using a kit connected to a smartphone application                                                                       | Nasajpour et al., 2020                                                                                           |
|                                | Stop Corona (Croatia)                                                        | Provides predictive heatmaps based on the disease spots                                                                                           | United against coronavirus! Stopcorona App. (2020) <a href="https://stopcorona.app/">https://stopcorona.app/</a> |
|                                | eRouska (smart quarantine) -Czech Republic                                   | Captures physical contacts between user and people                                                                                                | <a href="https://erouska.cz/en">https://erouska.cz/en</a> .                                                      |
|                                | StayHomeSafe (Hong Kong)                                                     | Monitoring of arrivals at the airport with use of smartphone application and a wristband                                                          | Kondylakis, 2020<br>Nasajpour et al., 2020                                                                       |
|                                | COVID-19 Intelligent Diagnosis and Treatment Assistant Program (nCapp)-China | an automated diagnosis system – it can automatically generate a diagnosis report based on requested data and questionnaires submitted by patients | Bai et al. (2020)                                                                                                |
|                                | Hamagen (Israel) Coalition (USA) BeAware Bahrain                             | Contact tracing                                                                                                                                   | Nasajpour et al., 2020                                                                                           |
| <b>Wearables</b>               | IoT-Q-Band                                                                   | Tracker wristband-Tracking of quarantined cases in case of absconding                                                                             | Singh et al, 2020                                                                                                |
|                                | Proximity Trace                                                              | Hardhat TraceTag - monitoring workers for social distancing                                                                                       | <a href="https://bit.ly/2B60rF2">https://bit.ly/2B60rF2</a><br>Nasajpour et al., 2020                            |
|                                | EasyBand                                                                     | Pact wristband -monitor for social distance                                                                                                       | Tripathy, 2020                                                                                                   |
|                                | Smart glasses                                                                | Temperature monitoring                                                                                                                            | Nasajpour et al., 2020                                                                                           |
|                                | Smart helmet                                                                 | Temperature monitoring                                                                                                                            | Nasajpour et al., 2020                                                                                           |
|                                | Smart thermometers                                                           | Temperature monitoring                                                                                                                            | Nasajpour et al., 2020                                                                                           |
| <b>Drones</b>                  | Thermal imaging drone (Pandemic Drone)                                       | Temperature monitoring in a crowd                                                                                                                 | Nasajpour et al., 2020                                                                                           |
|                                | Announcement drone                                                           | Broadcasting information about COVID-19                                                                                                           | Nasajpour et al., 2020                                                                                           |
|                                | Disinfectant drone (DJI)                                                     | Sterilisation of contaminated areas                                                                                                               | Nasajpour et al., 2020                                                                                           |
|                                | Surveillance drone (MicroMultiCopter)                                        | Monitoring of social distancing                                                                                                                   | Nasajpour et al., 2020                                                                                           |
|                                | Multipurpose drone (Corona Combat)                                           | Disinfection, monitoring od temperature, broadcasting of information                                                                              | Nasajpour et al., 2020                                                                                           |
| <b>Robots</b>                  | Telerobots- DaVinci surgical robots                                          | Reduction of the infection risk for medical staff                                                                                                 | Khan, 2020                                                                                                       |
|                                | Autonomous robots -Spot robot                                                | Disinfection, collection of swabs, checking and treatment of patients<br>Prevention of the risk of infection of the medical staff                 | Nasajpour et al., 2020<br>Khan, 2020                                                                             |

**Table 3: IoT approaches in COVID-19 management**

|                                                                      |                                                                    |                                                     |                        |
|----------------------------------------------------------------------|--------------------------------------------------------------------|-----------------------------------------------------|------------------------|
|                                                                      | Collaborative robots – eXtreme Disinfection Robot, Asimov Robotics | Complementary to the healthcare staff- disinfection | Yang, 2020             |
| <b>IoT buttons small, programmable button connected to the cloud</b> | Wanda QuickTouch                                                   | Alerts the authorities or families                  | Nasajpour et al., 2020 |
|                                                                      | Sefucy                                                             | Alerts healthcare providers in case of an emergency | Nasajpour et al., 2020 |

Swayamsiddha, S, Mohanty, C (2020). "Application of cognitive Internet of Medical Things for COVID-19 pandemic". *Diabetes Metab Syndr.* **14**(5):911-915. doi:10.1016/j.dsx.2020.06.014

Yang, G., Lv, H., Zhang, Z., Yang, L., Deng, J., You, S., Du, J., Yang, H (2020). "Keep healthcare workers safe: application of teleoperated robot in isolation ward for COVID-19 prevention and control". *Chin J Mech Eng* **33**(1):1-4

Bai, L., Yang, D., Wang, X., Tong, L., Zhu, X., Zhong, N., Bai, C., Powell, C.A., Chen, R., Zhou, J., et al. (2020) "Chinese experts' consensus on the internet of things-aided diagnosis and treatment of coronavirus disease 2019 (COVID-19)". *Clinical eHealth* **3**:7-15

Nasajpour, M., Pouriye, S., Parizi, RM., Dorodchi, M., Valero, M., Arabnia, HR. (2020) "Internet of Things for Current COVID-19 and Future Pandemics: an Exploratory Study". *J Healthc Inform Res.* **12**:1-40. doi: 10.1007/s41666-020-00080-6.

Singh, V.K., Chandna, H., Kumar, A., Kumar, S., Upadhyay, N., Utkarsh, K (2020). "IoT-Q-Band: a low cost internet of things based wearable band to detect and track absconding COVID-19 quarantine subjects". *EAI Endorsed Transactions on Internet of Things*, **20**(21):163997, DOI:[10.4108/eai.13-7-2018.163997](https://doi.org/10.4108/eai.13-7-2018.163997)

Tripathy, A.K., Mohapatra, A.G., Mohanty, S.P., Kougianos, E., Joshi, A.M., Das, G (2020) "Easyband: a wearable for safety-aware mobility during pandemic outbreak". *IEEE Consumer Electronics Magazine*

Ye, Q., Zhou, J., Wu, H (2020). "Using Information Technology to Manage the COVID-19 Pandemic: Development of a Technical Framework Based on Practical Experience in China". *JMIR Med Inform.* **8**(6):e19515. doi: 10.2196/19515. PMID: 32479411;

Khan, Z.H., Siddique, A., Lee, C.W. "Robotics Utilization for Healthcare Digitization in Global COVID-19 Management" (2020). *Int J Environ Res Public Health.* **17**(11):3819. doi:10.3390/ijerph17113819
